# Supplementary material
Source: HighWire-hosted journal article supplement (https://bmjopen.bmj.com/content/12/6/e058613)
Supplement: inline-supplementary-material-2 [file inline-supplementary-material-2.pdf]

## Supplementary Appendix 2 – Interview Guide

*Interview Guide*

*Housekeeping issue (tape should capture their consent to be recorded):* Before we begin, I just want to note that we'd like to record this conversation. We plan to transcribe the tape and review the transcript as a team, but this will not include your name. Is that okay with you?

1. Where and when should initial follow-up care take place for AKI survivors, in your mind?
  - a. *(For all interviewees)* In our survey we found that nephrologists were more likely recommend follow-up with nephrology than primary care providers. How would you explain that trend?
  - b. *(If interviewing a primary care provider)* When would you get Nephrology involved?
  - c. *(If interviewing a nephrologist)* What is the role of the patient's primary care provider, as it relates to post-AKI care?
  - d. What clinical criteria influence your decisions about location and timing of follow-up?

*Probe: characteristics about the AKI episode such as severity or extent of kidney function recovery, comorbidities, age, characteristics about recent illness or hospitalization*

2. What specific components of care do you feel are the most important for AKI survivors?

*Probe: tests, imaging, education, frequency of follow-up, specialist referrals/consultation*

- a. How do you incorporate patient preferences and values in your decision-making?
3. What non-clinical, patient-specific factors (e.g. insurance, proximity to healthcare resources) do you consider in your decisions about follow-up monitoring and referrals?

*Probe: insurance, caregiver/family/support structure, physical proximity of residence to healthcare facilities*

## Supplementary Appendix 2 – Interview Guide

4. What role should telemedicine (e.g. specialty consults) or virtual patient visits play in conducting outpatient follow-up for AKI survivors?

5. Ideally, how should information be communicated between different providers that are caring for the same patient?

6. What other factors haven't we touched on that are important in post-AKI care?

a. Is there anything that Mayo Clinic is missing that would make this process more successful?

7. What role can other healthcare disciplines play in conducting post-AKI care?

*Probe: pharmacists, dieticians, nurses*

8. What is the impact of hospital discharge practices on outpatient appointments and referrals?

9. What do you perceive as barriers to increasing the Nephrology's capacity to accommodate referrals?
